# Supplementary material for: Co-delivery of doxorubicin and P-glycoprotein siRNA by multifunctional triblock copolymers for enhanced anticancer efficacy in breast cancer cells
Source: Royal Society of Chemistry journal article supplement (doi:10.1039/c5tb00031a), 2015-01-01
Supplement: c5tb00031a1.pdf [file c5tb00031a1.pdf]

## Supplementary Information

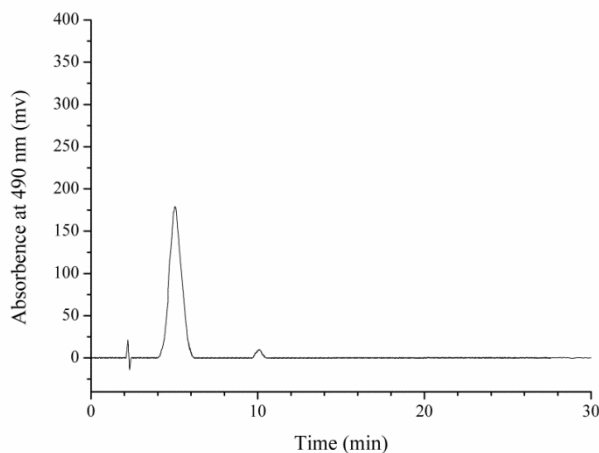

**Fig. S1.** HPLC trace of mPEG-*b*-P(LG-Hyd-DOX)-*b*-PDMAPMA. HPLC conditions: Shim-pack VP-ODS (150 × 4.6 mm, 5 μm), mobile phase: MeOH:H<sub>2</sub>O (7:3, v/v), flow rate: 0.8 mL/min, and UV detection wavelength: 490 nm.

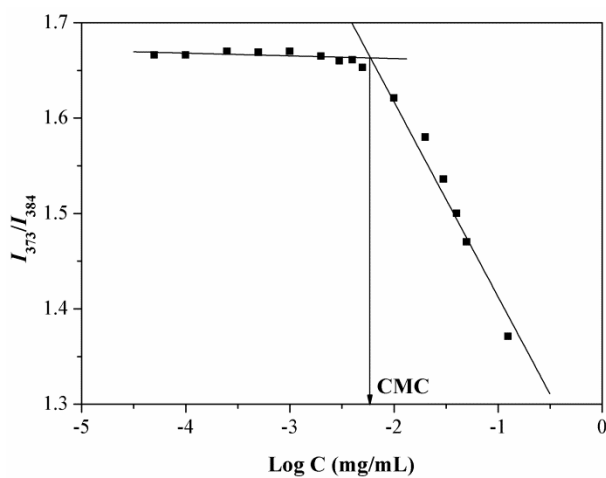

**Fig. S2.** CMC value of mPEG-*b*-P(LG-Hyd-DOX)-*b*-PDMAPMA determined by fluorescence spectroscopy using pyrene as a fluorescent probe.

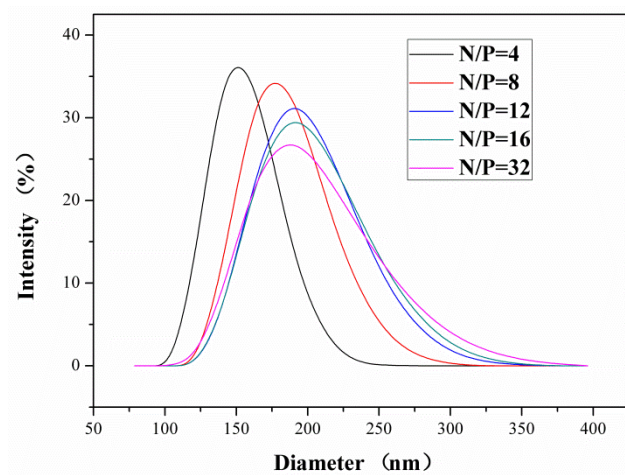

**Fig. S3.** DLS results of the nanocomplexes at different N/P ratios.
